1 **Neo-sex chromosomes and demography shape genetic diversity in the Critically**  
2 **Endangered Raso lark**

3

4 Elisa Dierickx<sup>1,2</sup>, Simon Sin<sup>3,5</sup>, Pieter van Veelen<sup>6,7</sup>, Michael de L. Brooke<sup>1</sup>, Yang Liu<sup>4</sup>,  
5 Scott Edwards<sup>3</sup> and Simon Martin<sup>1,8</sup>

6

7 <sup>1</sup> Department of Zoology, University of Cambridge

8 <sup>2</sup> Fauna & Flora International

9 <sup>3</sup> Department of Organismic and Evolutionary Biology and Museum of Comparative  
10 Zoology, Harvard University

11 <sup>4</sup> Department of Ecology, Sun Yat-sen University

12 <sup>5</sup> School of Biological Sciences, University of Hong Kong

13 <sup>6</sup> Wetsus, European Centre of Excellence for Sustainable Water Technology

14 <sup>7</sup> Groningen Institute for Evolutionary Life Sciences, University of Groningen

15 <sup>8</sup> Institute of Evolutionary Biology, University of Edinburgh

16

17 **KEYWORDS**

18 Skylark genome, genetic diversity, Cape Verde, conservation, *Alauda*, island endemic

19

20 **ABSTRACT**

21 Generally small effective population sizes expose island species to inbreeding and loss  
22 of genetic variation. The Raso lark has been restricted to a single islet for ~500 years,  
23 with a population size of a few hundred. To investigate the factors shaping genetic  
24 diversity in the species, we assembled a reference genome for the related Eurasian  
25 skylark and then assessed genomic diversity and demographic history using RAD-seq  
26 data (26 Raso lark samples and 52 samples from its two most closely related mainland  
27 species). Genetic diversity in the Raso lark is lower than in its mainland relatives, but is  
28 nonetheless considerably higher than anticipated given its recent population size. We  
29 found that suppressed recombination on large neo-sex chromosomes maintains  
30 divergent alleles across 13% of the genome in females, leading to a two-fold increase  
31 in overall diversity in the population. Moreover, we infer that the population contracted  
32 from a much larger size recently enough, relative to the long generation time of the  
33 Raso lark, that much of the pre-existing genetic variation persists. Nevertheless, the  
34 current small population size is likely to lead to considerable inbreeding. Overall, our  
35 findings allow for optimism about the ongoing reintroduction of Raso larks to a nearby  
36 island, but also highlight the urgency of this effort.

## 37 INTRODUCTION

38 Island species have suffered 89% of all recorded avian extinctions, despite only  
39 representing 20% of all bird species (1-4). Underlying this is island species'  
40 vulnerability to alien invasive species (3) and to threats linked to the intrinsic  
41 geographical characteristics of islands such as isolation and small distributional area  
42 (e.g. 5-8). Stochastic environmental events, habitat destruction or resource depletion  
43 can also harm island species more than continental counterparts, since the former may  
44 be unable to disperse into alternative habitat. Species with a small effective population  
45 size ( $N_e$ ) are also subject to three types of genetic risk: inbreeding depression through  
46 the exposure of deleterious recessive alleles and loss of heterozygote advantage (9-  
47 11); accumulation of deleterious alleles due to increased drift ("mutational meltdown")  
48 (9,12,13); and loss of potentially adaptive genetic variation limiting future adaptive  
49 potential (5,14-16). Previous studies have found that island species, particularly island  
50 endemics, often show reduced genetic diversity and increased inbreeding compared to  
51 their mainland counterparts, consistent with a reduction in  $N_e$  (5,17-18). However, the  
52 initial bottleneck associated with island colonisation may be more to blame than long-  
53 term reductions in  $N_e$  for island populations (18). For most species, poor census data  
54 makes it difficult to assess whether island existence *per se* is likely to expose species  
55 to the genetic risks above.

56

57 The Raso lark *Alauda razae* is endemic to the uninhabited 7km<sup>2</sup>-islet of Raso in Cape  
58 Verde (19). Irregular counts since 1965 and yearly counts since 2002 indicate a small  
59 population fluctuating from 20 breeding pairs to 1558 individuals (20-22) (Table S1).  
60 Raso lark sub-fossils indicate a larger past distribution encompassing neighbouring  
61 islands: Santa Luzia (35km<sup>2</sup>), São Vicente (227km<sup>2</sup>) and Santo Antão (779km<sup>2</sup>) (19;  
62 Figure 1). Raso larks disappeared abruptly from the neighbouring islands following the  
63 arrival of humans along with cats, dogs and rodents in 1462 (19). Today, Raso is the  
64 last of the larger islets of Cape Verde that remains free of these mammals.

65

66 Previous work suggests that a change to genome architecture might buffer Raso larks  
67 from genetic diversity loss. The genus *Alauda* has enlarged neo-sex chromosomes  
68 which appear to derive from ancestral autosomes (23). Cessation of recombination on  
69 neo-sex chromosomes could represent a source of heterozygosity, because females  
70 (the heterogametic sex) could retain distinct alleles at homologous loci on their neo-Z  
71 and neo-W chromosomes. Indeed, Brooke et al. (24) observed a microsatellite locus  
72 with sex-linked segregation and excessive heterozygosity in female Raso larks, and  
73 hypothesised that the neo-sex chromosomes could allow the retention of diversity in  
74 the face of population contraction. This could impact the genetic diversity, and therefore

75 the survival, of Raso larks, particularly if the neo-W and neo-Z represent a large  
76 proportion of the genome (as suggested by cytogenetic analysis;25) and if  
77 recombination is suppressed across large tracts of these chromosomes, allowing  
78 retention of distinct alleles in females. These conditions have hitherto not been directly  
79 tested with genome-wide data.

80

81 To investigate the impact of the population contraction on genetic diversity in the Raso  
82 lark, and the potential role of the neo-sex chromosomes in buffering this impact, we  
83 produced a high-quality draft genome assembly for the related Eurasian skylark *Alauda*  
84 *arvensis* and used restriction site associated DNA sequencing (RAD-seq) of 78  
85 individuals from four lark species: Raso lark, Eurasian skylark, Oriental skylark *A.*  
86 *gulgula* (the third currently-recognised *Alauda* species) and crested lark *Galerida*  
87 *cristata*. Our findings reveal effects of both demographic change and neo-sex  
88 chromosomes in shaping genetic diversity, and provides insights relevant for Raso lark  
89 conservation.

90

## 91 **METHODS**

92

### 93 ***Sample collection***

94 Twenty-six Raso lark blood samples were collected on Raso between 2002 and 2014.  
95 From colleagues, we also obtained blood and tissue samples for related species: 36  
96 Eurasian skylarks, that we group into three populations, 15 Oriental skylarks from two  
97 locations, and 5 crested larks from Saudi Arabia (Figure 1, Table S2). None of the  
98 sampled birds was likely to be a migrant based on the sampling dates (Table S2)  
99 and/or the migration pattern of the species (26,27). For samples with unknown sex,  
100 sex was determined using PCR (28) and/or by examination of heterozygosity on the Z-  
101 linked scaffolds (see Results).

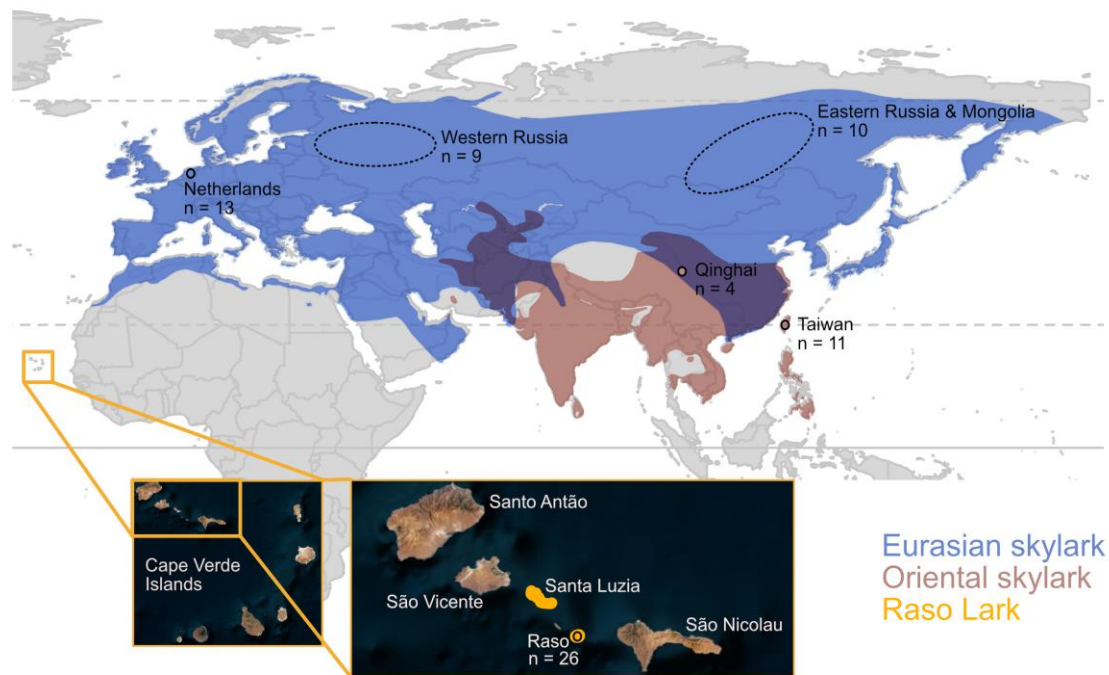

102  
103 **Figure 1. Species ranges, sampling locations and samples sizes**

104

### 105 ***Whole genome sequencing and assembly***

106 A draft reference genome was obtained through the whole-genome sequencing of a  
107 male Eurasian skylark sample (individual 0) collected in Mongolia (Table S2). Whole  
108 genomic DNA was isolated using DNeasy Blood & Tissue Kit (Qiagen, Venlo, The  
109 Netherlands) following the manufacturer's protocol. Two libraries were prepared: a  
110 220bp insert size fragment library using a PrepX ILM 32i DNA Library Kit for an Apollo  
111 324 robot, following the manufacturer's protocol (TaKaRa, Kusatsu, Japan), and a 3 kb  
112 mate-pair library using an Illumina Nextera Mate Pair Sample Preparation kit and  
113 following the manufacturer's protocol (Illumina, San Diego, CA, USA). Both libraries  
114 were sequenced on an Illumina HiSeq 2500 at the Bauer Core, Harvard, producing  
115 125bp paired-end reads.

116

117 The Eurasian skylark genome was assembled following the methods outlined in Gnerre  
118 et al. (29) (pipeline: [https://github.com/simonhmartin/Raso\\_lark\\_diversity](https://github.com/simonhmartin/Raso_lark_diversity)). Trimmomatic  
119 0.32 (30) was used for adaptor trimming; FastQC (31) to check read quality; and  
120 Allpaths-LG (29) to assemble the genome. Assembly summary statistics were  
121 calculated with Allpaths-LG.

122

### 123 ***RAD library preparation***

124 DNA was extracted using the DNeasy Blood and Tissue kit (Qiagen, Venlo, the  
125 Netherlands), following the manufacturer's protocol. Single digest RAD-seq libraries for  
126 each individual (except individual 0) were prepared according to the protocol of Merrill

127 et al. (32) using the enzyme *Pst*I. Each individual was assigned an 8-base pair (bp)  
128 inline barcode, and equimolar concentrations of 16 uniquely barcoded individuals were  
129 pooled and double-indexed by 16 cycles of high-fidelity PCR using Phusion High-  
130 Fidelity PCR Master Mix (Thermo Fisher Scientific, Waltham, MA, USA) with Illumina  
131 barcodes. The PCR products were pooled in equimolar quantities and sequenced on  
132 an Illumina HiSeq 1500 at the Gurdon Institute, University of Cambridge, producing  
133 100bp single-end reads.

134

### 135 ***Sequence processing and alignment***

136 We used *process\_radtags* in Stacks 1.35 (33) without quality filters to sort sequence  
137 reads by barcode. We then used Trimmomatic to trim restriction sites (6bp) and remove  
138 all trimmed reads shorter than 95bp. *Process\_radtags* was then used again to filter for  
139 quality. Reads were aligned to the Eurasian skylark genome using Bowtie 2 (34).  
140 Reads with multiple significant matches to the reference genome were removed.

141

### 142 ***Allele frequency spectra and genetic diversity***

143 We used a two-step pipeline in ANGSD (35) to infer allele frequency spectra from the  
144 RAD-seq reads mapped to the reference genome, accounting for uncertainty in low-  
145 coverage sequencing data. Genotype likelihoods were inferred using ANGSD with  
146 likelihood method 2, and only sites with a base alignment quality (baq)  $\geq 1$  and SNP  
147 quality  $\geq 20$  were considered. A mapping quality adjustment of 50 was applied. The  
148 *realSFS* tool was then used to infer the allele frequency spectrum with a maximum of  
149 100 iterations, with 20 bootstraps. Nucleotide diversity ( $\pi$ ) was computed from the  
150 frequency spectrum as the sum of the weighted products of the major and minor allele  
151 counts for each allele count category, including the zero category (invariant sites).

152

### 153 ***Pseudo-chromosomal assembly***

154 To explore how diversity varies across the genome, chromosome positional information  
155 is required. We inferred the approximate chromosomal location and orientation of each  
156 Eurasian skylark scaffold based on homology with the zebra finch *Taeniopygia guttata*  
157 genome (i.e. a pseudo-chromosomal assembly). We used the *nucmer* tool in MUMmer  
158 v3.23 (36) to identify regions of strong homology between the two species. Only  
159 scaffolds larger than 1 Mb were considered and alignments shorter than 5kb were  
160 discarded using the *delta-filter* tool. We used the *mummerplot* tool to visualise all  
161 alignments and determine the optimal scaffold order and orientation. Additional manual  
162 changes were then made based on visual inspection of the scaffold arrangement. In  
163 total, 311 scaffolds, totalling 648 Mb (63% of the genome) were placed on  
164 chromosomes.

165

### 166 ***Proportion of heterozygous sites across the genome***

167 To visualise how the proportion of heterozygous sites varies across the genome in  
168 each individual, we called genotypes using SAMtools mpileup version 1.2.1 and  
169 BCFtools call version 1.2.1 (37), with default parameters. We considered only  
170 genotypes with  $\geq 5x$  read depth, extracted using BCFtools filter. Thirteen individuals  
171 with poor coverage ( $< 3$  million of sites in the genome with  $\geq 5x$  coverage) were  
172 excluded. Individual heterozygosity was computed for 100 kb windows across each  
173 scaffold using the Python script popgenWindows.py  
174 ([github.com/simonhmartin/genomics\\_general](https://github.com/simonhmartin/genomics_general)). Windows with fewer than 100 sites (with  
175  $\geq 5x$  coverage) genotyped across the dataset were excluded.

176

### 177 ***Demographic inference***

178 We applied two different approaches to investigate historical demographic changes in  
179 the Raso lark based on the frequency spectrum (averaged across 20 bootstrap  
180 replicates). First we used  $\delta a \delta i$  (38) to compare four different models of increasing  
181 complexity. The first model imposes a constant population size. Since  $\delta a \delta i$  only  
182 optimises the shape of the frequency spectrum, this model has no free parameters.  
183 The second model adds a single change in population size at some point in the past  
184 (two free parameters: time and relative size of the new population). The third and fourth  
185 models each added an additional change (along with two free parameters). Model  
186 optimisation was performed using grid sizes of 50, 60 and 70, and repeated 10 to 50  
187 times to confirm optimisation.

188

189 In the second approach we used Stairway Plot (39) to infer the optimal population size  
190 history given the SFS. We used the “two-epoch” model, with the recommended 67% of  
191 sites for training and 200 bootstraps. We tested four different numbers of random  
192 breakpoints: 12, 25, 37 and 50.

193

194 To convert inferred population sizes and times to numbers of individuals and years,  
195 respectively, we used the collared flycatcher *Ficedula albicollis* mutation rate estimate  
196 of  $4.6 \times 10^{-9}$  per site per generation (40). We estimated the generation time of the Raso  
197 lark, defined as the mean age of the parents of the current cohort at age at first  
198 breeding + (1/mean annual mortality) (41). This gave a generation time of 6.5 years.

199

### 200 ***Relatedness***

201 We estimated relatedness among individuals using two methods suited to low  
202 coverage genomic data. The first was NgsRelate (42), which considers genotype



203 likelihoods. These were computed for each individual using the GATK version 3.4  
204 (43,44) HaplotypeCaller tool in GVCF mode with default parameters. NgsRelate was  
205 run on a filtered VCF file that included sites covered by at least one read in each  
206 individual in the population. The second approach was KGD (45), which is designed for  
207 GBS data such as RAD-seq data, and also accounts for low sequencing depth. The  
208 input file was generated using ANGSD (35) with the option -dumpcounts 4 to give read  
209 counts of each base for each individual at each site. Only sites covered by at least 100  
210 reads across the 26 Raso larks or 50 reads across the 13 Eurasian skylarks from the  
211 Netherlands were included. Following Dodds et al. (45), we explored filtering options to  
212 find SNP subsets that gave realistic values of self-relatedness ( $\sim 1$ ). The chosen filter  
213 was to use only SNPs with a Hardy-Weinberg disequilibrium value between 0 and 0.1.  
214

## 215 **RESULTS**

216

### 217 ***Genome-wide diversity***

218 We generated a high-quality draft genome assembly for the Eurasian skylark, totalling  
219 1.06 Gb with a scaffold N50 length of 1.44 Mb (71.5 Kb for contigs). This was based on  
220 154,342,128 reads in the 220bp library and 263,949,984 reads in the 3 kb library.  
221

222 RAD-seq reads for 78 individuals were mapped to the reference genome, yielding a  
223 high density of RAD loci sequenced to low depth (min = 1.5x, max = 6.9x, mean = 2.8x)  
224 (Table S2). Using a threshold of at least 100 reads across the dataset to designate a  
225 shared RAD locus, this gives 85 million genotyped sites across the dataset, of which 6  
226 million are SNPs.  
227

228 Average nucleotide diversity ( $\pi$ ) across the 26 Raso larks based on inferred allele  
229 frequency spectra is 0.0018. This is 18.6% of that in Eurasian skylark from the  
230 Netherlands (0.0097), and nearly half of that in the Oriental skylark from Taiwan  
231 (0.0044) (Figure 2). Assuming an equilibrium population with  $\Theta = 4N_e\mu$  and a per-  
232 generation mutation rate equivalent to that of the collared flycatcher, this translates to  
233 an effective population size ( $N_e$ ) of  $\sim 100,000$  in the Raso lark, compared to  $\sim 500,000$  in  
234 the Eurasian skylark. Therefore, genetic diversity in the Raso lark, despite being five-  
235 fold lower than that in the Eurasian skylark, is consistent with a population size far  
236 larger than its current census population size of  $\sim 1000$  individuals. Our subsequent  
237 analyses therefore investigated two factors that could explain the unexpectedly high  
238 diversity in Raso larks: (1) large neo-sex chromosomes (23) could elevate diversity in  
239 females (24) and (2) the population contraction to its current size could be too recent to  
240 have eliminated genetic diversity.

241

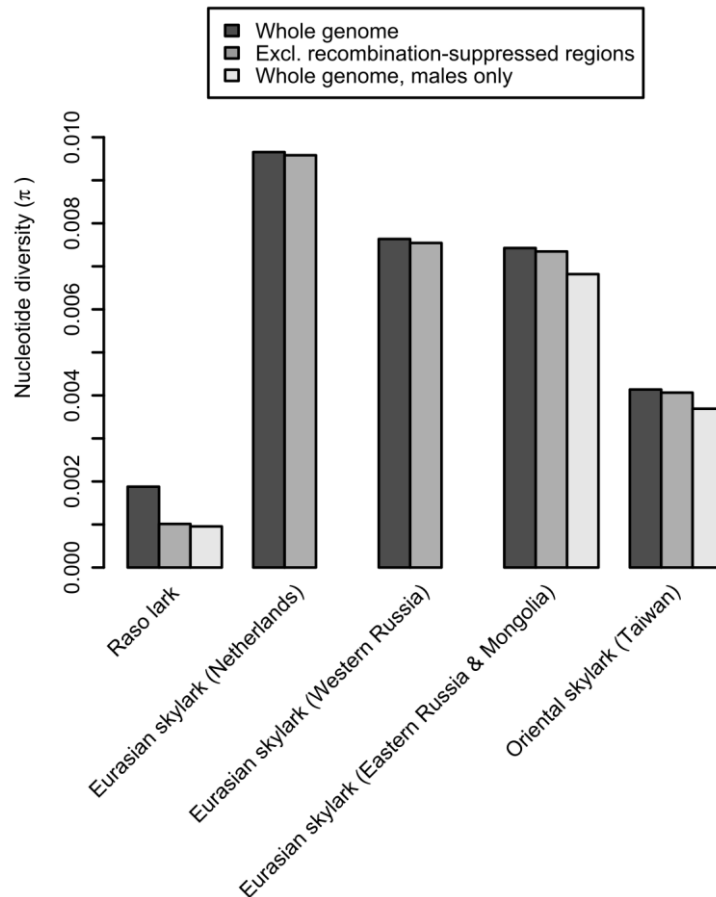

242

243 **Figure 2. Diversity is reduced in the Raso lark.** Nucleotide diversity ( $\pi$ ) computed from  
244 inferred allele frequency spectra (i) using all genome scaffolds across all individuals in each  
245 population, (ii) excluding scaffolds identified as showing suppressed recombination in females  
246 (see Figure S1), or (iii) using all scaffolds, but only males. Values are plotted for populations  
247 with  $\geq 5$  representative individuals. Detailed values are given in Table S3.

248

#### 249 ***Elevated diversity across neo-sex chromosomes***

250 Genetic diversity in Raso larks may be maintained on the large neo-sex chromosomes  
251 (24). This would occur if recombination was suppressed between the neo-Z and neo-  
252 W, allowing the co-existence of divergent alleles in females. Estimated heterozygosity  
253 in each individual based on the RAD-seq reads mapped to the reference genome,  
254 partitioned in 100 kb windows is strongly elevated in female Raso larks across large  
255 portions of chromosomes 3, 4a and 5 (Figure 3). By contrast, males show a  
256 consistently low proportion of heterozygous sites across the whole genome (Figure 3).  
257 Previously, only part of chromosome 4a had been identified as sex-linked in several  
258 members of the Sylvioidea clade, including the Eurasian skylark (23). Our findings  
259 suggest that large portions of chromosomes 3 and 5 also form part of the neo-sex  
260 chromosomes. The elevated heterozygosity in females indicates that recombination is



261 suppressed between parts of the *neo-W* and *neo-Z*. It is important to note that the  
262 chromosome map used here - based on the zebra finch genome - does not reflect the  
263 true karyotype for larks. For example, it has already been shown that only part of  
264 chromosome 4a (called 4a-1) has become sex-linked. The other fragment (4a-2)  
265 remains autosomal and therefore its lack of elevated heterozygosity is expected.  
266 Without a linkage map, we cannot determine whether similar fragmentation of  
267 chromosomes 3 and 5 has occurred, but given the broad extent of recombination  
268 suppression, it is likely that these two chromosomes are entirely sex-linked.  
269

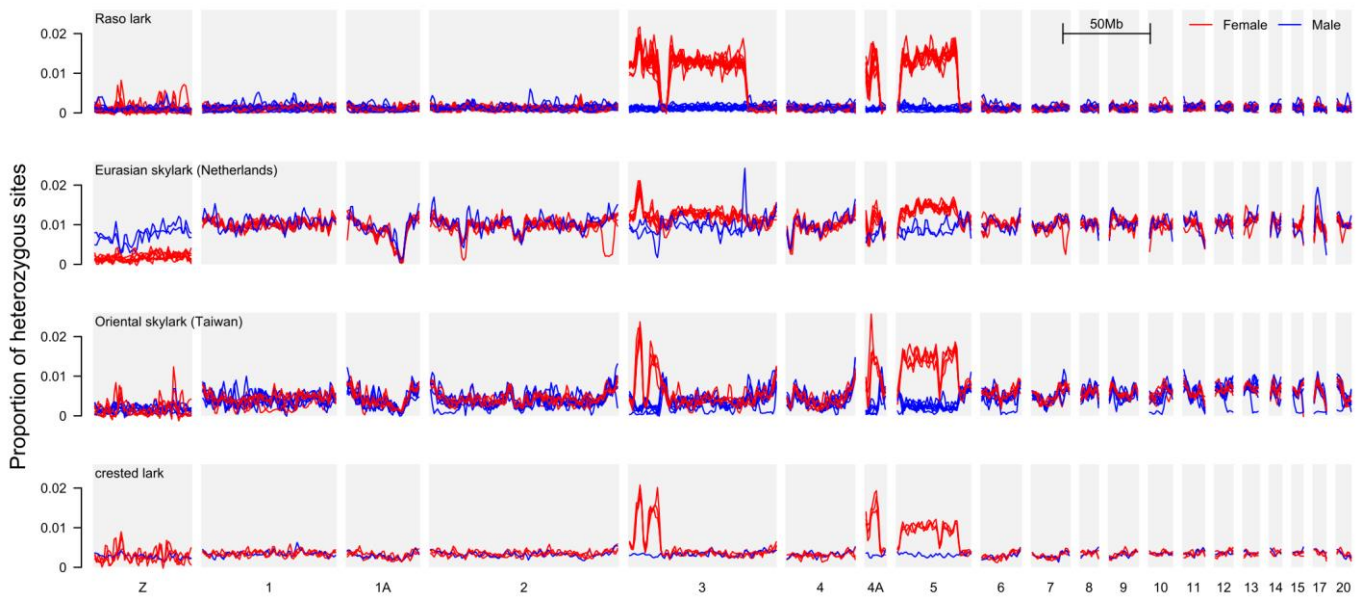

270 **Figure 3. Individual heterozygosity reveals neo-sex chromosomes.** The proportion of  
271 heterozygous sites per 100 kb window in each individual, plotted across each chromosome  
272 (based on homology with the zebra finch), with locally-weighted smoothing (loess, span = 5  
273 Mb). Females and males are indicated by red and blue lines, respectively. One population from  
274 each species is shown (see Figure S2 for all populations). Three Eurasian skylark samples from  
275 the Netherlands (samples 6, 4 and 28) are excluded from this plot on the basis that they had  
276 excessive heterozygosity or homozygosity resembling sequencing errors.

277

278 Comparison with the other species gives insights into the progression of recombination  
279 suppression through time. A difference between male and female heterozygosity exists  
280 across the same three chromosomes in Eurasian skylarks from the Netherlands, but it  
281 is far less pronounced (Figure 3). This is due to the much higher genome-wide  
282 background heterozygosity in this population, whereas heterozygosity in the regions of  
283 suppressed recombination is similar between Eurasian skylark and the Raso lark. The  
284 same three chromosomes also show enhanced heterozygosity in female Oriental  
285 skylark and crested lark, but over smaller portions of chromosomes 3 and 5. A similar  
286 analysis in a recent study of two additional outgroup species, the bearded reedling

287 *Panurus biarmicus* and the horned lark *Eremophila alpestris*, which also carry neo-sex  
 288 chromosomes, revealed an even more reduced pattern of recombination suppression,  
 289 that excludes chromosome 5 (46). This allows us to partially reconstruct the timing of  
 290 recombination suppression, which has occurred in a stepwise manner in “strata,”  
 291 following fusions of chromosomes 4a-1 and later 3 and 5, to the W (Figure 4). The  
 292 initial suppression occurred in two narrow strata on chromosomes 3 and 4a-1 (46). This  
 293 increased marginally on chromosome 3 in the common ancestor of the larks, and was  
 294 followed by the formation of a large new stratum across most of chromosome 5 in the  
 295 common ancestor of the crested lark and the *Alauda* larks. Further recombination  
 296 suppression in several parts of chromosome 3 then probably occurred in the ancestor  
 297 of *Alauda*. However, this was likely polymorphic, because it is lacking in the Oriental  
 298 skylark, and also in the eastern populations of the Eurasian skylark, but it is present in  
 299 the western populations of the Eurasian skylark as well as in the Raso lark (Figure S2,  
 300 Figure 4).

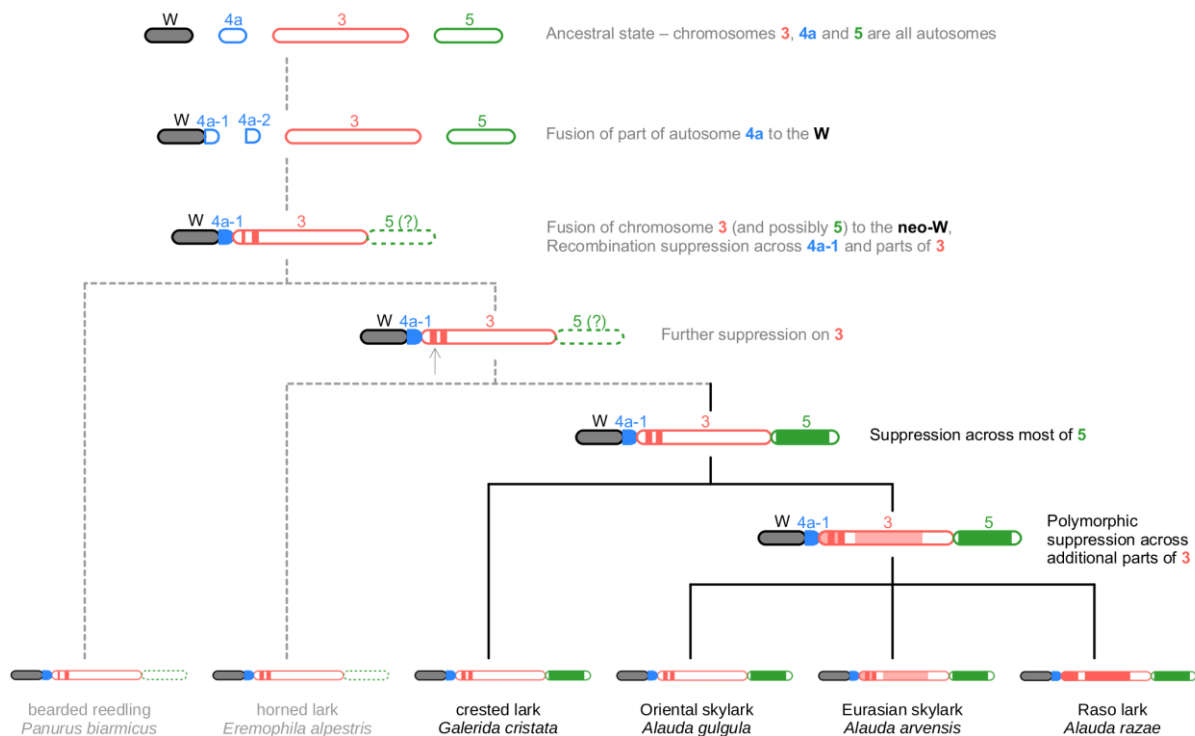

301

302 **Figure 4. A model for the evolution of neo-sex chromosomes in larks.** The most  
 303 parsimonious ancestral states are indicated based on linkage mapping (23) and patterns of  
 304 recombination suppression in present-day species (Figure 3 and see 46). Inferences based on  
 305 other studies (23,50) are shown in grey, and uncertain fusions are shown by dashed lines. Note  
 306 that the order and orientation of the fused chromosomes 3 and 5 is unknown, so the  
 307 representation here is one of several possibilities. Regions of suppressed recombination (Figure  
 308 3) are indicated by filled boxes. Light shading indicates polymorphic recombination suppression  
 309 (i.e. in some populations but not others; Figure S2)

310

311 ***Raso lark diversity remains higher than expected when neo-sex chromosomes***  
312 ***are excluded***

313 When the regions showing recombination suppression in females (Figure S1) are  
314 excluded,  $\pi$  in the Raso lark is nearly halved (Figure 2, Table S3). A similar reduction is  
315 seen when females are simply excluded. Recombination suppression across the neo-  
316 sex chromosomes therefore does indeed contribute to the maintenance of genetic  
317 variation in the Raso lark. This suppression influences only 12.6% of the genome, but  
318 contributes to almost half of the observed diversity in this species. Less pronounced  
319 reductions in diversity are seen in the Eurasian skylark and Oriental skylark  
320 populations, as expected given their higher genome-wide background diversity.

321  
322 Nevertheless, even after accounting for the neo-sex-chromosomes,  $\pi$  in the Raso lark  
323 is  $\sim 0.001$ , about 10% of that in Eurasian skylarks from the Netherlands. This is still far  
324 greater than expected given the difference in current population sizes between the two  
325 species. The discrepancy between census population size and diversity implies that  
326 our second hypothesis may also be valid: there has been insufficient time since the  
327 population contraction for significant loss of genetic diversity in Raso larks.

328  
329 ***Genomic signatures of ancient and recent bottlenecks***

330 To investigate more closely whether a recent population collapse has left a detectable  
331 signature on Raso lark genetic diversity, we examined the allele frequency spectrum,  
332 which carries information about historical population size changes (47,48). Surprisingly,  
333 the frequency spectrum (computed after excluding scaffolds showing evidence for  
334 suppressed recombination; see Figure S1) is skewed towards an excess of rare  
335 variants (Figure S3), which is also captured in the negative Tajima's D value of -0.7. An  
336 excess of rare variants is typical of population expansion rather than contraction and is  
337 therefore not consistent with our understanding of the recent history of the Raso lark.  
338 This skew was consistent across 20 bootstrap replicates and 26 'drop-one-out'  
339 replicates, in which a single individual was excluded in each case (Figure S3), implying  
340 that it is not a sampling artefact.

341  
342 We therefore used two related approaches to explore the historical demography of this  
343 species based on the frequency spectrum. First, we used  $\delta a \delta i$  (38) to compare the fit of  
344 simple models allowing zero, one, two or three changes in population size in the past.  
345 The simplest model imposes a constant population size, and shows a very poor fit to  
346 the data, as expected (Figure S4). A model that allows a single change in population  
347 size in the past shows a far better fit and a greatly improved composite likelihood  
348 (Figure S4). The inferred model involves an ancient population expansion from  $\sim 50,000$

349 to ~450,000 individuals ~60,000 years ago (Figure S4). Note that the inferred values  
350 for population size and timing of these events should not be interpreted as exact  
351 historical estimates, as these depend on our imperfect knowledge of generation time  
352 and mutation rate. Instead, the broad pattern of population size change over time is  
353 most relevant here, as this determines the shape of the allele frequency spectrum. This  
354 one-change model is able to recreate the excess of singleton variants in Raso larks,  
355 but still shows a fairly poor fit for to the frequency of other rare variants. The model  
356 allowing two changes in population size again shows a major increase in likelihood and  
357 better fit to the frequency spectrum (Figure S4). Note that the inferred demographic  
358 model does not include a recent contraction. Instead, it consists of an ancient  
359 bottleneck down to ~6,000 individuals followed by an expansion ~100,000 years ago to  
360 ~300,000 individuals. These findings show that the distribution of genetic variation in  
361 the Raso lark can be explained very accurately by a few ancient demographic changes,  
362 without inclusion of a recent population contraction.

363

364 Given the recent census estimates of ~1000 individuals for the Raso lark, we  
365 attempted to fit a final model that allows for a recent population contraction. As  $\delta a \delta i$   
366 failed to optimise a model with a third change in population size (i.e. two additional free  
367 parameters), we instead used a fixed population contraction, and performed a manual  
368 search to approximate this parameter estimate by re-running the optimization across a  
369 range of final  $N_e$  values from 0.1% to 1% of the ancestral size. The resulting best fit  
370 model once again shows an improved fit to the data over models without a recent  
371 contraction, although it results in minimal detectable difference to the expected  
372 frequency spectrum (Figure S4). The model again involves an ancestral bottleneck that  
373 ended over 100,000 years ago, but with a larger population of over 3 million individuals  
374 since then, followed by a recent contraction down to about 350 individuals that  
375 occurred just 50 years (around 8 generations) ago (note again that parameter  
376 estimates are not to be interpreted as exact). Because all events in  $\delta a \delta i$  are  
377 timed relative to the estimated ancestral  $N_e$ , we are unable to fit a model in which the  
378 contraction is fixed precisely at a given date, such as the predicted 85 generations ago  
379 for human settlement of Cape Verde. Nonetheless, we can conclude from these  
380 models that the distribution of genetic variation in the Raso lark is consistent with a  
381 recent and dramatic population contraction, but one that is so recent as to have had  
382 very little impact on the overall distribution of genetic diversity in this species.

383

384 Our second approach used Stairway Plot (41) to estimate the optimal population size  
385 history given the frequency spectrum. The inferred history is remarkably similar in its  
386 general structure to the 3-change model inferred using  $\delta a \delta i$ , with a strong ancestral

387 bottleneck around 100,000 years ago followed by expansion to a large population of  
388 nearly a million individuals, with a sharp recent contraction (Figure 5). The contraction  
389 is most pronounced in the most recent past, it is inferred to have initiated further in the  
390 past, ~10,000 years ago. Given the  $\delta a \delta i$  results showing, that any signal of the most  
391 recent population contraction in the frequency spectrum is fairly weak, it is likely that  
392 the exact timing of this event would be difficult to infer. Nevertheless, both approaches  
393 indicate that the Raso lark population was probably very large up until fairly recently,  
394 thus agreeing with our second hypothesis that the population still retains much genetic  
395 variation that pre-dates its recent contraction.  
396

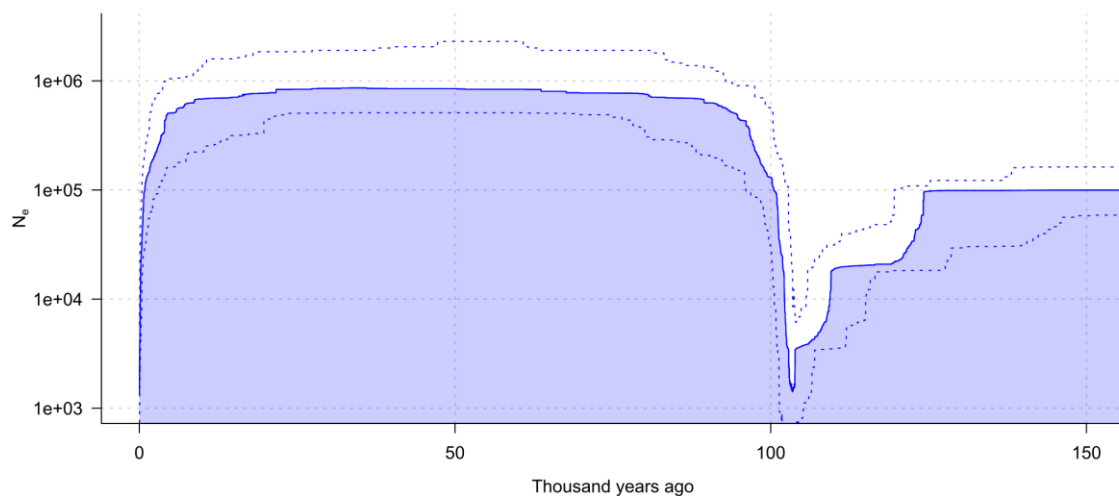

397  
398 **Figure 5. Demographic model fitting suggests an ancient bottleneck.** The inferred  $N_e$  (log  
399 scale) over time (with the present on the left), based on inference using Stairwayplot (41).  
400 Dashed lines indicate the 95% confidence interval.

401

#### 402 **Relatedness**

403 Even if it has had little effect on overall diversity, a recent population collapse may be  
404 detectable by an increase in the number of related individuals in the population. Using  
405 two different methods, we find that most of the 26 Raso lark samples show little or no  
406 detectable relatedness, but that three pairs of individuals show levels of relatedness of  
407 ~0.5, indicating either sibling or parent-offspring relationships, while several other pairs  
408 showed non-zero relatedness of up to 0.2 (Figure S5). One of the pairs of close  
409 relatives consists of individuals sampled three years apart, in 2011 and 2014, making  
410 this unlikely to be a sampling artefact (Figure S5). Unfortunately, due to a labelling error  
411 of some Raso lark DNA samples, the dates of sampling for the other two related pairs  
412 are unknown. The equivalent analyses performed for the 13 Eurasian skylarks from the  
413 Netherlands found no consistent evidence of high relatedness (Figure S5). Given our  
414 relatively small sample sizes, we cannot draw strong conclusions from these results,



415 but they may indicate that inbreeding is beginning to become a threat to the Raso lark  
416 population.

417

## 418 **DISCUSSION**

419

420 Genetic markers have long been used to investigate the genetic risks facing species  
421 thought to have small  $N_e$ , such as island endemics (5,17,18). Genomic approaches  
422 now allow us to address these questions at far greater resolution, revealing how  
423 different parts of the genome have been affected, and inferring past demography. We  
424 find that the island-endemic Raso lark has reduced genetic diversity compared to its  
425 widespread *Alauda* relatives, but that this difference is smaller than expected. The  
426 Eurasian skylark is comparable in diversity to other highly diverse birds such as the  
427 zebra finch ( $\pi \approx 0.01$ ; 50), and diversity in the Raso lark is only five-fold lower than this.  
428 This is inconsistent with the large difference in census population sizes: there are an  
429 estimated one million breeding pairs of Eurasian skylarks in the United Kingdom alone  
430 (51), and ~40-1500 Raso larks on Raso. Our findings indicate that the unexpectedly  
431 high diversity in Raso larks can be explained by the recency of the population  
432 contraction from a much larger ancestral size, with an added buffering effect provided  
433 by enlarged neo-sex chromosomes that retain excess heterozygosity in females.

434

435 Previous work (23) suggested that neo-W and neo-Z chromosomes arose at the base  
436 of the *Sylvioidea* 42.2 million years ago through fusion of part of chromosome 4a to  
437 both the W and Z. Our results indicate that two other large chromosomes, 3 and 5,  
438 have become fused to the W in the genera *Alauda* and *Galerida*. Another recent study  
439 (46) supports these observations and further indicates that at least chromosome 3 is  
440 also sex-linked in two additional outgroup species (horned lark, bearded reedling).  
441 Without a linkage map we cannot determine whether homologs of chromosomes 3 and  
442 5 have also fused to the Z to form a neo-Z (as is known to be the case for chromosome  
443 4a-1; 23). The observation by Bulatova (25) that both W and Z chromosomes are  
444 enlarged in larks supports this.

445

446 Despite the deep age of the neo-sex chromosomes, our results indicate fairly strong  
447 homology between the neo-W and neo-Z in the regions of recombination suppression,  
448 with around 1-1.5% divergence. This value may be somewhat underestimated, as the  
449 most divergent parts would be excluded due to poor read mapping (46). Nevertheless,  
450 even a divergence of 2% would translate to ~2.2 million generations to coalescence,  
451 much less than the age of the neo-sex chromosomes. Importantly, this coalescence  
452 time reflects not the age of the fusions but rather the age and extent of recombination



453 suppression. Recombination and gene conversion may continue to occur at low levels  
454 even between divergent parts of the chromosomes. Moreover, large tracts of all three  
455 chromosomes show low levels of heterozygosity consistent with ongoing  
456 recombination. Comparisons among species indicate that recombination suppression  
457 has progressed further in Raso lark than in Oriental skylark and crested lark.  
458 Furthermore, we find evidence for variation in the extent of recombination in Eurasian  
459 skylarks, implying that populations can exist for a long time with variable levels of  
460 recombination suppression in the sex chromosomes.

461  
462 It is tempting to speculate that the large extent of recombination suppression seen in  
463 Raso larks has been favoured by selection following the loss of genetic diversity.  
464 However, the trend in Eurasian skylarks does not support this reasoning, as the  
465 greatest extent of suppression is seen in the more diverse western populations. A  
466 perhaps more likely explanation, is that recombination suppression has been favoured  
467 by sexually antagonistic selection (46, 52). In any case, the resulting maintenance of  
468 high heterozygosity across roughly 13% of the genome, which accounts for about half  
469 of the genetic diversity in Raso larks overall, may have fitness benefits for females, but  
470 these would be difficult to distinguish from other sex differences.

471  
472 When we exclude the sex chromosomes, levels of diversity in Raso larks are still far  
473 higher than their tiny population size would predict. Such a mismatch between  
474 differences in genetic diversity and census population size is a well-documented  
475 phenomenon (53,54). Research in this field is typically aimed at explaining a lower-  
476 than-expected diversity in larger populations, either through a mismatch between  
477 census and effective population sizes (55), or through increased action of selection  
478 affecting linked sites (56,57). Higher-than-expected diversity in smaller populations  
479 requires a different explanation, such as gene flow from other populations, increased  
480 mutation rate, or recent contraction from larger ancestral size (18). In the case of the  
481 Raso lark, gene flow is unlikely, given that the other two *Alauda* species are largely  
482 restricted to Eurasia. We can also confidently rule out an increase in mutation rate in  
483 the Raso lark compared to its *Alauda* relatives, because the level of divergence  
484 between the neo-Z and neo-W is similar in all three species. A recent reduction from a  
485 larger size is therefore the most likely explanation. Assuming this coincided with the  
486 settlement of Cape Verde in 1462, the generation time of Raso larks means that this  
487 would correspond to just 85 generations ago. Under a simple model of loss of  $1/2N$   
488 times the ancestral variation through drift each generation, with a current  $N_e$  of 1000,  
489 this translates to a retention of over 95% of the pre-existing genetic diversity (Figure  
490 S6). Even in the more extreme case of  $N_e = 100$ , > 60% of the diversity is retained.

491

492 While it may be unsurprising that the recent contraction has failed to eliminate genetic  
493 diversity, we were surprised by the skew towards rare variants in the allele frequency  
494 spectrum, indicating that the genetic make-up of this population is largely shaped by a  
495 major population expansion that occurred deeper in the past. Our estimate of just over  
496 100,000 years ago for this expansion following a strong bottleneck may coincide with  
497 their colonisation of Cape Verde. Summing the areas of the surrounding islands, Santa  
498 Luzia, São Vicente and Santo Antão (19), we can predict a minimum ancestral range of  
499 1,048km<sup>2</sup>, which is ~150 times the area of Raso. Extrapolating from the current  
500 population of  $\approx$  1000 predicts an ancestral population size of 150,000. Our modelling  
501 estimates a much larger  $N_e$  of nearly a million prior to the recent collapse. It is possible  
502 that Raso larks were more abundant due to higher population density in the past, or  
503 that their colonisation of Cape Verde from a larger mainland population occurred more  
504 recently.

505

506 Despite the considerable genetic diversity in Raso larks relative to their population size,  
507 continued existence at this size will inevitably increase their genetic risks. We found  
508 three pairs of closely related Raso larks out of 26 sampled. While we cannot rule out a  
509 chance effect, finding related individuals is to be expected given that the population  
510 dropped to just 57 individuals in 2004, around two generations ago. With sufficient  
511 sample sizes, individual-level relatedness may provide more sensitive detection of  
512 recent population collapse than population-level diversity, which can take multiple  
513 generations to change appreciably.

514

515 Another likely and serious risk for this species is the loss of future adaptive potential  
516 (58). Cape Verde is particularly vulnerable to environmental changes such as climate  
517 change (59)). Adaptive potential is also relevant for the ongoing reintroduction of Raso  
518 larks to Santa Luzia (the first birds were translocated in April 2018). While this  
519 translocation project is crucial for the conservation of the species, it could constitute  
520 another bottleneck on Santa Luzia if the founder population is too small. The success  
521 of previous reintroduction programmes for vertebrates has been highly variable, with  
522 inbreeding in small founder populations and the resulting vulnerability to disease often  
523 being cited as a cause of failure (60,61). The strong skew towards an excess of rare  
524 variants in Raso larks, as a result of their historical bottleneck and subsequent  
525 expansion, may make the challenge greater than usual, as by definition most mutations  
526 segregating in the population are present in just one or a few individuals and are thus  
527 more likely to be missed in a small sample set.

528

529 In conclusion, our findings give cause for both optimism and concern for the Raso lark.  
530 The appreciable genetic diversity retained means that there is hope for the ongoing  
531 reintroduction to other islands, but loss of diversity and inbreeding depression seem  
532 inevitable if the population persists at its current size.

533

#### 534 **ACKNOWLEDGEMENTS**

535 Nick Horrocks and Per Alström shared crested lark and Eurasian skylark samples.  
536 Allison Shultz provided feedback over the course of this project. Marco van der Velde  
537 and Sarah Barker advised on genetic sexing and on RAD library preparation. Chris  
538 Jiggins let us use his laboratory. Thanks to the field assistants on Raso: Mark Bolton,  
539 Ewan Campbell, Simon Davies, Mike Finnie, Tom Flower, Lee Gregory, Sabine Hille,  
540 Mark Mainwaring, Jason Moss and Justin Welbergen.

541

#### 542 **FUNDING**

543 We were supported by the Sir Peter Scott Studentship and the Rouse Ball Eddington  
544 Fund of Trinity College, Cambridge (to EGD), the VOCATIO Award (to EGD), the  
545 William Bateson Fellowship of St John's College, Cambridge (to SHM), Julian Francis,  
546 RSPB, CEPF, and BirdLife International's Preventing Extinctions Initiative.

547

#### 548 **REFERENCES**

- 549 1. Johnson, TH, and AJ Stattersfield. 1990. "A Global Review of Island Endemic  
550 Birds." *Ibis* 132 (2): 167–80.
- 551 2. Manne, LL, TM Brooks, and SL Pimm. 1999. "Relative Risk of Extinction of  
552 Passerine Birds on Continents and Islands." *Nature* 399 (May): 258–61.
- 553 3. Butchart, SHM, AJ Stattersfield, and TM Brooks. 2006. "Going or Gone: Defining  
554 'Possibly Extinct' Species to Give a Truer Picture of Recent Extinctions." *Bulletin of*  
555 *the British Ornithological Club* 126 (A): 7–24.
- 556 4. BirdLife International. 2011. "We Have Lost over 150 Bird Species since 1500."  
557 [http://datazone.birdlife.org/sowb/casestudy/we-have-lost-over-150-bird-species-](http://datazone.birdlife.org/sowb/casestudy/we-have-lost-over-150-bird-species-since-1500)  
558 [since-1500.](http://datazone.birdlife.org/sowb/casestudy/we-have-lost-over-150-bird-species-since-1500)
- 559 5. Frankham, R. 1998. "Inbreeding and Extinction: Island Populations." *Conservation*  
560 *Biology* 12 (3): 665–75.
- 561 6. Parmesan, C. 2006. "Ecological and Evolutionary Responses to Recent Climate  
562 Change." *Annual Review of Ecology Evolution and Systematics* 37 (May): 637–69.
- 563 7. Bellard, C, C Bertelsmeier, P Leadley, W Thuiller, and F Courchamp. 2012.  
564 "Impacts of Climate Change on the Future of Biodiversity." *Ecology Letters* 15 (4):  
565 365–77.

- 566 8. Ferreira, MT, P Cardoso, PAV Borges, R Gabriel, EB de Azevedo, F Reis, MB  
567 Araújo, and RB Elias. 2016. "Effects of Climate Change on the Distribution of  
568 Indigenous Species in Oceanic Islands (Azores)." *Climate Change* 138: 603–15.
- 569 9. O'Grady, JJ, BW Brook, DH Reed, JD Ballou, DW Tonkyn, and R Frankham.  
570 2006. "Realistic Levels of Inbreeding Depression Strongly Affect Extinction Risk in  
571 Wild Populations." *Biological Conservation* 133 (1): 42–51.
- 572 10. Edmands, S. 2007. "Between a Rock and a Hard Place: Evaluating the Relative  
573 Risks of Inbreeding and Outbreeding for Conservation and Management."  
574 *Molecular Ecology* 16: 463–75.
- 575 11. Charlesworth, D, and JH Willis. 2009. "The Genetics of Inbreeding Depression."  
576 *Nature Reviews Genetics* 10: 783-96.
- 577 12. Lynch, M, J Conery, and R Burger. 1995. "Mutational Meltdowns in Sexual  
578 Populations." *Evolution* 49 (6): 1067–80.
- 579 13. Reed, DH. 2005. "Relationship between Population Size and Fitness."  
580 *Conservation Biology* 19 (2): 563–68.
- 581 14. Tollington, S, CG Jones, A Greenwood, V Tatayah, C Raisin, T Burke, DA Dawson,  
582 and JJ Groombridge. 2013. "Long-Term, Fine-Scale Temporal Patterns of Genetic  
583 Diversity in the Restored Mauritius Parakeet Reveal Genetic Impacts of  
584 Management and Associated Demographic Effects on Reintroduction  
585 Programmes." *Biological Conservation* 161: 28–38.
- 586 15. Nair, P. 2014. "Conservation Genomics." *Proceedings of the National Academy of  
587 Sciences of the United States of America* 111: 569.
- 588 16. Romiguier, J, P Gayral, M Ballenghien, A Bernard, V Cahais, A Chenuil, Y Chiari,  
589 et al. 2014. "Comparative Population Genomics in Animals Uncovers the  
590 Determinants of Genetic Diversity." *Nature* 515 (7526): 261–63.
- 591 17. Frankham, R. 1997. "Do Island Populations Have Less Genetic Variation than  
592 Mainland Populations?" *Heredity* 78 (3): 311–27.
- 593 18. James, JE, R Lanfear, and A Eyre-Walker. 2016. "Molecular Evolutionary  
594 Consequences of Island Colonization." *Genome Biology and Evolution* 8 (6):  
595 1876–88.
- 596 19. Mateo, JA, LF Lópex Jurado, and P Geniez. 2009. "Historical Distribution of Razo  
597 Lark *Alauda razae* in the Cape Verde Archipelago." *Alauda* 77 (4): 309–12.
- 598 20. Ratcliffe, N, LR Monteiro, and CJ Hazevoet. 1999. "Status of the Raso lark *Alauda  
599 razae* with Notes on Threats and Foraging Behaviour." *Bird Conservation  
600 International* 9: 43–46.
- 601 21. Donald, P, and M de L Brooke. 2006. "An Unlikely Survivor: The Peculiar Natural  
602 History of the Raso lark." *British Birds* 99: 420–30.

- 603 22. Brooke, M de L. 2018. "Extreme Rainfall-Related Clutch Size Variation in the  
604 Critically Endangered Raso lark *Alauda Razae* of the Arid Cape Verde Islands."  
605 Bird Conservation International. doi:10.1017/S0959270918000163.
- 606 23. Pala, I, S Naurin, M Stervander, D Hasselquist, S Bensch, and B Hansson. 2012.  
607 "Evidence of a Neo-Sex Chromosome in Birds." *Heredity* 108 (3): 264–72.
- 608 24. Brooke, M de L, JA Welbergen, MC Mainwaring, M Van Der Velde, AMF Harts, J  
609 Komdeur, and W Amos. 2010. "Widespread Translocation from Autosomes to Sex  
610 Chromosomes Preserves Genetic Variability in an Endangered Lark." *Journal of*  
611 *Molecular Evolution* 70: 242–46.
- 612 25. Bulatova, NS. 1973. "Unusually Large Sex Chromosomes in Some Larks (Aves:  
613 *Alaudidae*)." *Mammalian Chromosomes Newsletter* 14: 150–51.
- 614 26. BirdLife International. 2016. "Species Factsheet."  
615 <http://www.birdlife.org/datazone/species-factsheet.php?id=3957>.
- 616 27. IUCN. 2017. "IUCN Red List of Threatened Species. Version 2016.3." Accessed  
617 January 18. <http://www.redlist.org/>.
- 618 28. Griffiths, R, MC Double, K Orr, and RJG Dawson. 1998. "A DNA Test to Sex Most  
619 Birds." *Molecular Ecology* 7 (8): 1071–75.
- 620 29. Gnerre, S, I Maccallum, D Przybylski, FJ Ribeiro, JN Burton, BJ Walker, T Sharpe,  
621 et al. 2011. "High-Quality Draft Assemblies of Mammalian Genomes from  
622 Massively Parallel Sequence Data." *Proceedings of the National Academy of*  
623 *Sciences of the United States of America* 108 (4): 1513–18.
- 624 30. Bolger, AM, M Lohse, and B Usadel. 2014. "Trimmomatic: A Flexible Trimmer for  
625 Illumina Sequence Data." *Bioinformatics* 30 (15): 2114–20.
- 626 31. Andrews, S. 2010. "FastQC: A Quality Control Tool for High Throughput Sequence  
627 Data." <http://www.Bioinformatics.Babraham.Ac.Uk/Projects/Fastqc/>. doi:citeulike-  
628 article-id:11583827.
- 629 32. Merrill, RM, P Rastas, SH Martin, MC Melo, S Barker, J Davey, WO McMillan, and  
630 CD Jiggins. 2019. "Genetic Dissection of Assortative Mating Behavior." *PLOS*  
631 *Biology* 17 (2): e2005902.
- 632 33. Catchen, J, PA Hohenlohe, S Bassham, A Amores, and WA Cresko. 2013. "Stacks:  
633 An Analysis Tool Set for Population Genomics." *Molecular Ecology* 22 (11): 3124–  
634 40.
- 635 34. Langmead, B, and SL Salzberg. 2012. "Fast Gapped-Read Alignment with Bowtie  
636 2." *Nature Methods* 9 (4): 357–59.
- 637 35. Korneliussen, TS, A Albrechtsen, and R Nielsen. 2014. "ANGSD: Analysis of Next  
638 Generation Sequencing Data." *BMC Bioinformatics* 15 (1). doi:10.1186/s12859-  
639 014-0356-4.



- 640 36. Kurtz, S, S Salzberg, M Shumway, A Delcher, C Antonescu, A Phillippy, and M  
641 Smoot. 2004. "Versatile and Open Software for Comparing Large Genomes."  
642 *Genome Biology* 5 (2): R12.
- 643 37. Li H, Handsaker B, Wysoker A, Fennell T, Ruan J, Homer N, Marth G, Abecasis G,  
644 Durbin R. 2009. "The Sequence Alignment/Map format and SAMtools."  
645 *Bioinformatics* 25, 2078–9.
- 646 38. Gutenkunst, RN, RD Hernandez, SH Williamson, and CD Bustamante. 2009.  
647 "Inferring the Joint Demographic History of Multiple Populations from  
648 Multidimensional SNP Frequency Data." *PLoS Genetics* 5 (10).  
649 doi:10.1371/journal.pgen.1000695.
- 650 39. Liu, X, and YX Fu. 2015. "Exploring Population Size Changes Using SNP  
651 Frequency Spectra." *Nature Genetics* 47 (5): 555–59.
- 652 40. Smeds, L, A Qvarnström, and H Ellegren. 2016. "Direct Estimate of the Rate of  
653 Germline Mutation in a Bird." *Genome Research* 26 (9): 1211–18.
- 654 41. Dierickx, EG, R Robinson and M de L Brooke. 2019. "Survival of a Long-Lived  
655 Single Island Endemic, the Raso lark *Alauda razae*, in Relation to Fluctuating  
656 Population and Rainfall." *Scientific Reports*. In review.
- 657 42. Korneliussen, T, and I Moltke. 2015. "NgsRelate: A Software Tool for Estimating  
658 Pairwise Relatedness from next-Generation Sequencing Data." *Bioinformatics* 31  
659 (24): 4009–11.
- 660 43. Van der Auwera, GA, M Carneiro, C Hartl, R Poplin, G del Angel, A Levy-  
661 Moonshine, T Jordan, et al. 2013. "From FastQ Data to High-Confidence Variant  
662 Calls: The Genome Analysis Toolkit Best Practices Pipeline." *Current Protocols in*  
663 *Bioinformatics* 43: 11.10.1-11.10.33.
- 664 44. DePristo, MA, E Banks, RE Poplin, KV Garimella, JR Maguire, C Hartl, AA  
665 Philippakis, et al. 2011. "A Framework for Variation Discovery and Genotyping  
666 Using." *Nature Genetics* 43 (5): 491–98.
- 667 45. Dodds, KG, JC McEwan, R Brauning, RM Anderson, TC Stijn, T Kristjánsson, and  
668 SM Clarke. 2015. "Construction of Relatedness Matrices Using Genotyping-by-  
669 Sequencing Data." *BMC Genomics* 16 (1): 1–15.
- 670 46. Sigeman, H, S Ponnikas, P Chauhan, EG Dierickx, M de L Brooke, and B  
671 Hansson. 2019. "Repeated Evolution During a Recent Avian Sex Chromosome  
672 Expansion." doi: <https://doi.org/10.1101/585059>.
- 673 47. Marth, GT, E Czabarka, J Murvai, and ST Sherry. 2004. "The Allele Frequency  
674 Spectrum in Genome-Wide Human Variation Three Large World Populations."  
675 *Genetics* 372 (January): 351–72.



- 676 48. Polanski, A, and M Kimmel. 2003. "New Explicit Expressions for Relative  
677 Frequencies of Single-Nucleotide Polymorphisms with Application to Statistical  
678 Inference on Population Growth." *Genetics* 165 (1): 427–36.
- 679 49. Hedrick, PW, and RC Lacy. 2015. "Measuring Relatedness Between Inbred  
680 Individuals." *Journal of Heredity* 106 (1):20-5.
- 681 50. Balakrishnan, CN, and SV Edwards. 2009. "Nucleotide Variation, Linkage  
682 Disequilibrium and Founder-Facilitated Speciation in Wild Populations of the Zebra  
683 Finch (*Taeniopygia guttata*)." *Genetics* 181 (2): 645–60.
- 684 51. Donald, PF. 2004. *The Skylark*. London: T & AD Poyser.
- 685 52. Wright, AE, R Dean, F Zimmer, and JE Mank. 2016. "How to Make a Sex  
686 Chromosome." *Nature Communications* 7 (May): 12087.
- 687 53. Lewontin, RC. 1974. *The Genetic Basis of Evolutionary Change*. New York:  
688 Columbia University Press.
- 689 54. Leffler, EM, K Bullaughey, D. Matute, WK Meyer, L Séguérel, A Venkat, P  
690 Andolfatto, and M Przeworski. 2012. "Revisiting an Old Riddle: What  
691 Determines Genetic Diversity Levels within Species?" *PLoS Biology* 10 (9).  
692 doi:10.1371/journal.pbio.1001388.
- 693 55. Avise, JC, J Arnold, RM Ball, E Bermingham, T Lamb, JE Neigel, CA Reeb, and  
694 NC Saunders. 1987. "Intraspecific Phylogeography: The Mitochondrial DNA  
695 Bridge Between Population Genetics and Systematics." *Annual Review of  
696 Ecology and Systematics* 18 (1): 489–522.
- 697 56. Cutter, AD, and BA Payseur. 2013. "Genomic Signatures of Selection at Linked  
698 Sites: Unifying the Disparity among Species." *Nature Reviews Genetics*.  
699 doi:10.1038/nrg3425.
- 700 57. Corbett-Detig, RB, DL Hartl, and TB Sackton. 2015. "Natural Selection  
701 Constrains Neutral Diversity across A Wide Range of Species." *PLoS Biology*  
702 13 (4). doi:10.1371/journal.pbio.1002112.
- 703 58. de Villemereuil, P, A Rutschmann, KD Lee, JG Ewen, P Brekke, and AW  
704 Santure. 2019. "Little Adaptive Potential in a Threatened Passerine Bird."  
705 *Current Biology* 29 (5): 889–94.  
706
- 707 59. Ministry of Environment Housing and Territory Planning of Cape Verde. 2011.  
708 "Climate Change Vulnerability Assessment of Cape Verde: Summary for Policy  
709 Makers." Praia.
- 710 60. Frankham, R, JD Ballou, and DA Briscoe. 2002. *Introduction to Conservation  
711 Genetics*. Cambridge: Cambridge University Press.
- 712 61. Brekke, P, PM Bennett, J Wang, N Pettorelli, and JG Ewen. 2010. "Sensitive  
713 Males: Inbreeding Depression in an Endangered Bird." *Proceedings of the*

714 Royal Society B: Biological Sciences 277 (1700): 3677–84.  
715 doi:10.1098/rspb.2010.1144.
